# Supplementary material
Source: MDPI journal article supplement (https://www.mdpi.com/2072-4292/15/12/3187)
Supplement: s1 [file s1 › remotesensing-2396062-supplementary.pdf]

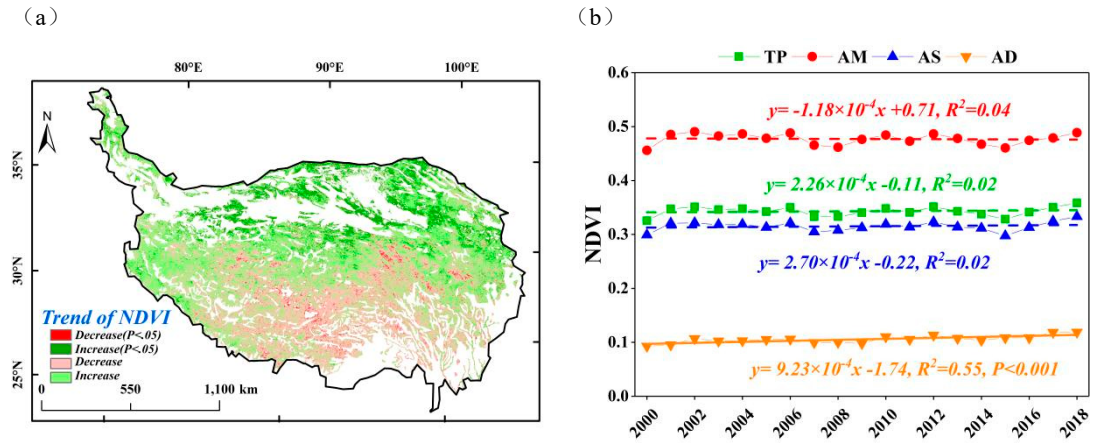

**Figure S1.** Spatial and temporal dynamics of NDVI in grassland on the Qinghai-Tibet Plateau from 2000 to 2018  
 (Fig.S1a Spatial dynamics of NDVI on the Qinghai-Tibet Plateau during 2000-2018 and  
 its temporal dynamics in Fig.S1b, TP: total grassland of the QTP; AM, alpine meadow; AS, alpine steppe; AD,  
 alpine desert)

The trend distribution of grassland NDVI showed that the increasing trend was 63.2% (14.2%,  $P < 0.05$ ) in the northern part of the Qinghai-Tibet Plateau. The decreasing trend was 36.8% (1.9%,  $P < 0.05$ ), mainly in the central and southern parts of the Plateau (Fig S1a). The multi-year dynamics of different grassland types showed that there was a significant increasing trend only in alpine desert, but there was no significant result in other grassland types, although there was a positive trend (Fig S1b).

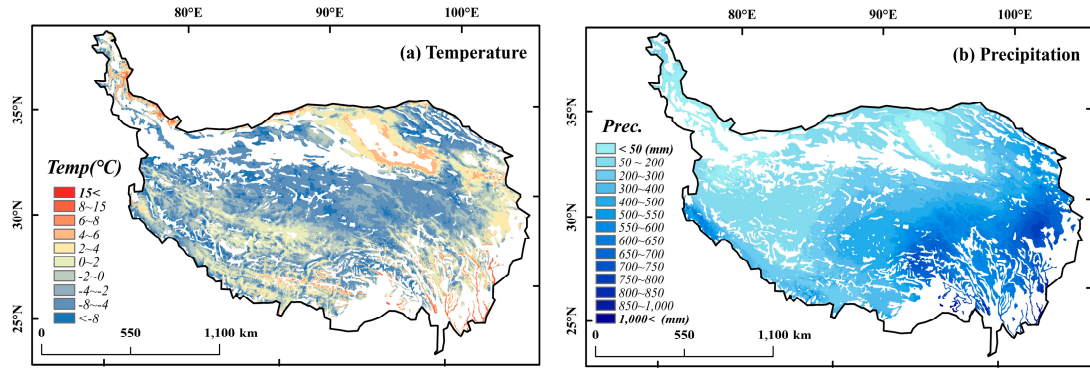

**Figure S2.** Spatial distribution of annual mean temperature (a) and mean precipitation (b) in the grasslands of the Tibetan Plateau from 2000 to 2018

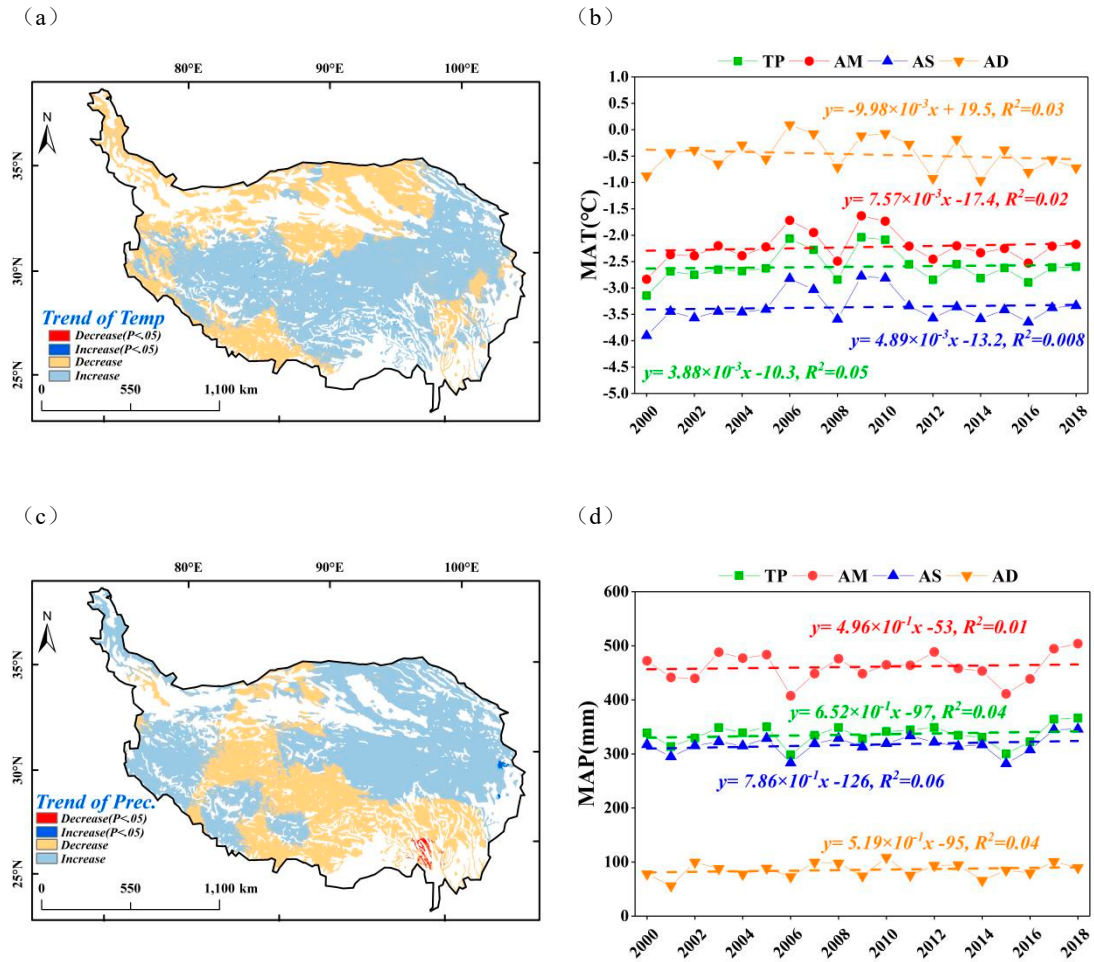

**Figure S3.** Temporal and spatial dynamics of grassland temperature and precipitation on the Qinghai-Tibet Plateau from 2000 to 2018 (Fig.S3a the spatial dynamics of temperature and Fig.S3b the temporal dynamics of grassland on the Qinghai-Tibet Plateau; Fig.S3c the spatial dynamics of precipitation and Fig.S3d the temporal dynamics of grassland on the Qinghai-Tibet Plateau; TP: total grassland of the QTP; AM, alpine meadow; AS, alpine steppe; AD, alpine desert)
